# Supplementary material for: Available energy fluxes drive a transition in the diversity, stability, and functional structure of microbial communities
Source: PubMed Central journal article supplement (PMC6386421; doi:10.1371/journal.pcbi.1006793), 2019-02-05
Supplement: pcbi.1006793.s003.pdf [file pcbi.1006793.s003.pdf]

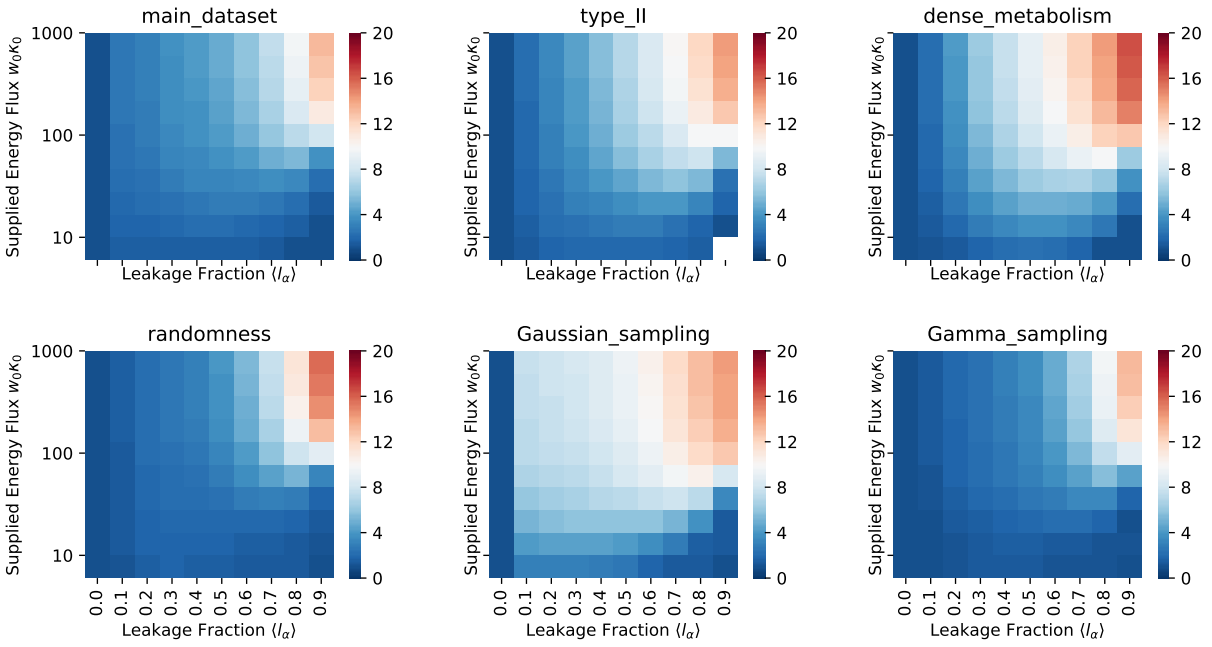

Figure S2: **Simpson Diversity vs.  $w_0\kappa_0$  and  $\langle l_\alpha \rangle$  under different modeling choices.** Simpson Diversity was computed according to Equation (30) of the Supporting Text, for each of the six model choices listed at the beginning of Supporting Text Section 3.
