# Supplementary material for: Available energy fluxes drive a transition in the diversity, stability, and functional structure of microbial communities
Source: PubMed Central journal article supplement (PMC6386421; doi:10.1371/journal.pcbi.1006793), 2019-02-05
Supplement: pcbi.1006793.s007.pdf [file pcbi.1006793.s007.pdf]

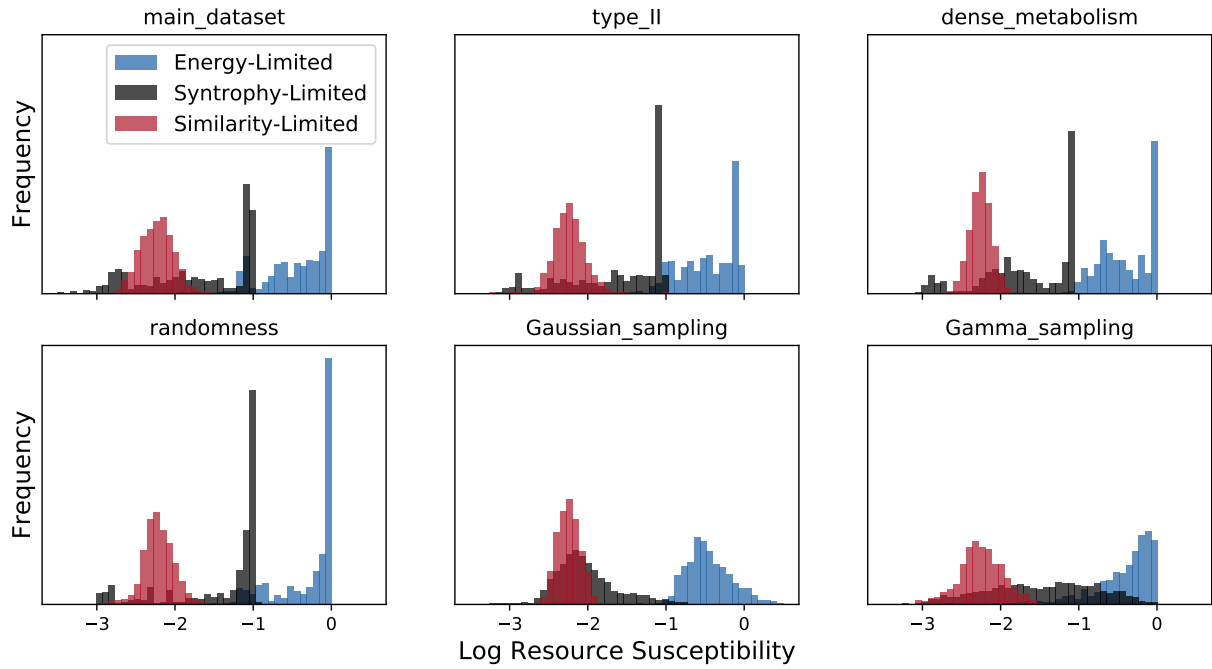

Figure S6: **Resource susceptibility.** Histograms of the logarithm  $\log_{10} \partial \bar{R}_\alpha / \partial \kappa_\alpha$  are plotted for the three examples highlighted in Figure 2, for each of the six model choices listed at the beginning of Supporting Text Section 3. The  $y$  axis indicates the total number of species falling into each bin from the combination of all resources for all 10 parallel communities in each example, excepting the externally supplied resource  $\alpha = 0$ .
