# Supplementary material for: Available energy fluxes drive a transition in the diversity, stability, and functional structure of microbial communities
Source: PubMed Central journal article supplement (PMC6386421; doi:10.1371/journal.pcbi.1006793), 2019-02-05
Supplement: pcbi.1006793.s009.pdf [file pcbi.1006793.s009.pdf]

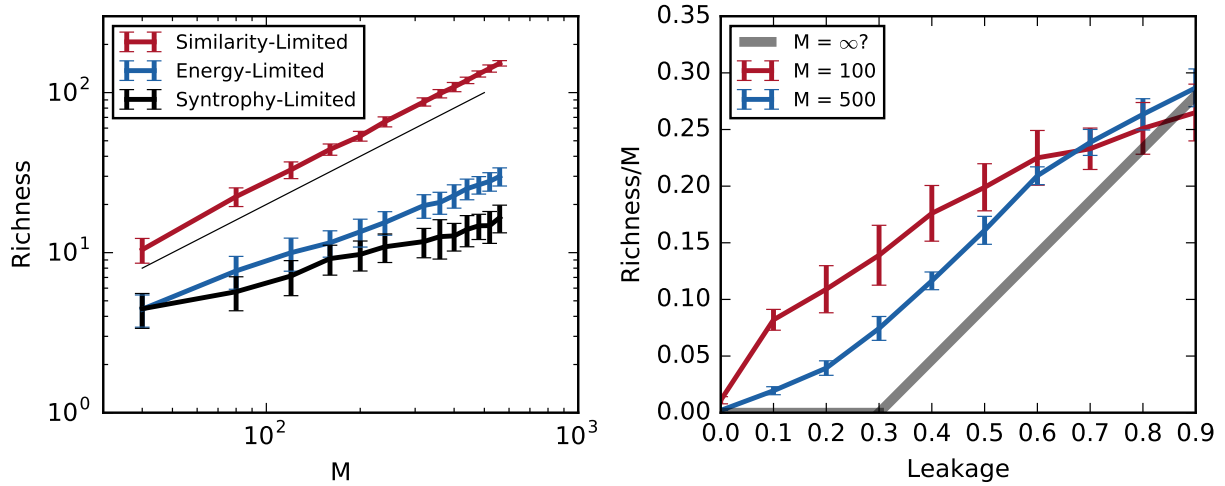

Figure S8: **Scaling of consumer richness with system size.** Left: Community richness in the three examples highlighted in Figure 2, as a function of the number of resource types  $M$  (with the rest of the parameters scaled as described in Supporting Text Section 1). The thin black line shows the slope corresponding to a linear scaling with  $M$ . Error bars are standard deviations over 100 samples per point. Right: Normalized richness as a function of leakage fraction at high energy supply  $w_0\kappa_0/M = 10$ . The top red line comes from the simulations of Figure 2 of the main text ( $M = 100$ ), and the middle blue line comes from new simulations with  $M = 500$ . The bottom gray line illustrates a possible  $M \rightarrow \infty$  limit, which would correspond to a continuous phase transition. Error bars are standard deviations over 10 samples per point.
