# Supplementary material for: Available energy fluxes drive a transition in the diversity, stability, and functional structure of microbial communities
Source: PubMed Central journal article supplement (PMC6386421; doi:10.1371/journal.pcbi.1006793), 2019-02-05
Supplement: pcbi.1006793.s011.pdf [file pcbi.1006793.s011.pdf]

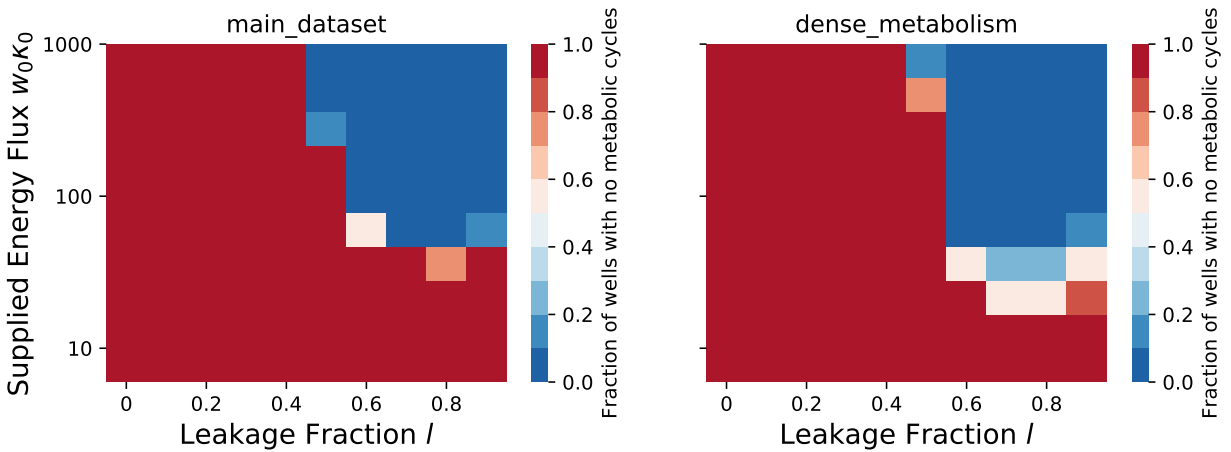

Figure S10: **Flux network topology.** We generated flux graphs like those of Figure 3 for both the sparse ('main\_dataset') and the dense ('dense\_metabolism') metabolic matrices shown there. We pruned the graphs as in the main text figure by removing edges with flux less than 1% of maximum flux in the network. For each condition, we used the Python package NetworkX ([networkx.github.io](https://networkx.github.io)) to determine how many of the ten replicates had acyclic graphs. The absence of cycles guarantees that these graphs can be topologically ordered like the left-hand panels of the figure. The color of each square represents the fraction of acyclic networks for the given values of  $l$  and  $w_0 \kappa_0$ .
